# Supplementary material
Source: PubMed Central journal article supplement (PMC1134989)
Supplement: bj3870601add.pdf [file bj3870601add.pdf]

## Supplementary Figure legends

**Fig. 1. The PXR<sup>-/-</sup> Mice are Functionally PXR-Deficient as Determined by a Loss of Liver CYP3A Induction by PCN Without Affecting the Expression of CYP2E.** **A**, representative gels of PCR-amplified DNA from tail tip extracted DNA from PXR<sup>+/+</sup>, PXR<sup>+/-</sup> and PXR<sup>-/-</sup> mice using the indicated primers (sequences given in Table 1). **B**, Western blot for CYP3A (upper panel) and CYP2E (lower panel) in liver microsomes from PXR<sup>+/+</sup> and PXR<sup>-/-</sup> mice administered PCN (100 mg/kg body weight by i.p. injection, suspended in olive oil) daily or olive oil vehicle only. Animals were treated for 3 days and microsomes prepared 24 hours after the last injection. Rat HC - rat hepatocyte extract. The anti-VINGA antibody was raised to the C-terminus of rat CYP3A2 and cross reacts with mouse CYP3A11, CYP3A16 and CYP3A41 which have a related VITGA C-terminal peptide sequence. **C**, CYP3A-mediated testosterone 6 $\beta$  hydroxylase activities in liver microsomal extracts from animals treated as outlined in B above.

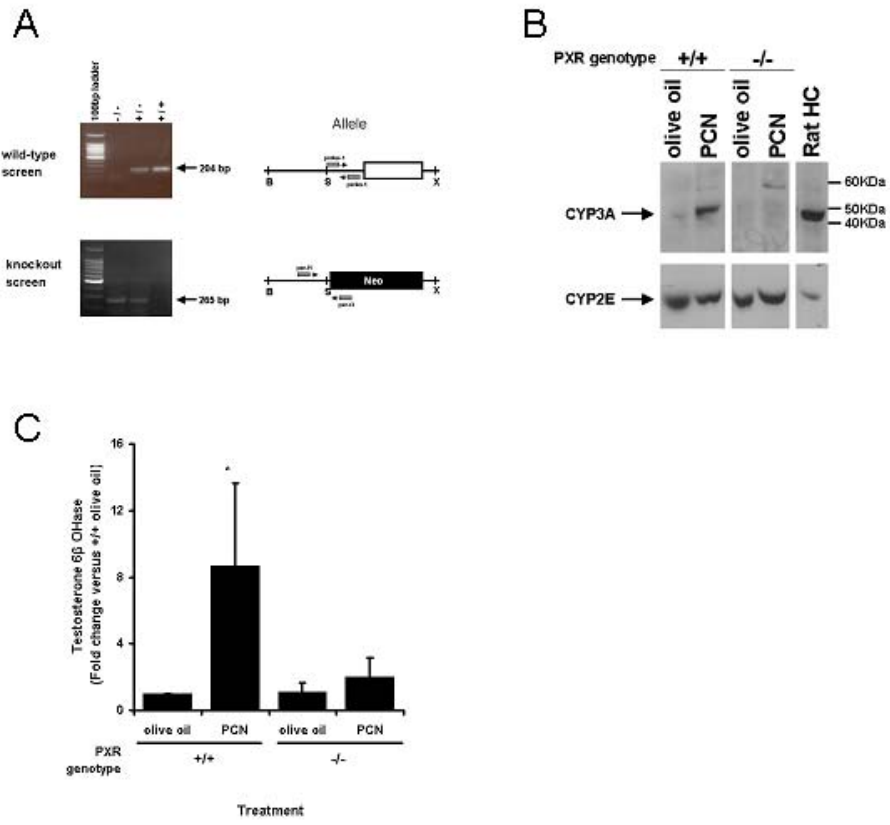

Supplementary Figure 1 Marek et al

**Supplementary Table 1. Rodent Chronic CCl<sub>4</sub> Liver Fibrosis Model - Determinants of Liver Damage and Fibrotic Severity Levels.**

A: Haematoxylin and Eosin stained liver sections - damage severity.

| <b>Criteria</b>                                                                                                                                                                                                                                                                                                                     | <b>Damage Severity</b> |
|-------------------------------------------------------------------------------------------------------------------------------------------------------------------------------------------------------------------------------------------------------------------------------------------------------------------------------------|------------------------|
| Widespread centrilobular necrosis with frequent central-portal bridging of cell loss accompanied by centrilobular collapse. Hepatocytes show degenerating changes (eosinophilia, ballooning) and fatty degeneration. Average cell loss and degenerating area >50% total field of view (with central vein placed in centre of view). | 5                      |
| Centrilobular necrosis with central-portal bridging of cell loss. Hepatocytes show degenerating changes (eosinophilia, ballooning) and fatty degeneration. Average cell loss and degenerating area between 20 - 50% total field of view (with central vein placed in centre of view).                                               | 4                      |
| Centrilobular degeneration (eosinophilia, ballooning) and fatty degeneration with some evidence of cell loss. Average cell loss and degenerating area < 20% total field of view (with central vein placed in centre of view).                                                                                                       | 3                      |
| Occasional focal necrosis with evidence of degeneration in surrounding cells.                                                                                                                                                                                                                                                       | 2                      |
| Occasional focal necrosis or evidence of focal degeneration.                                                                                                                                                                                                                                                                        | 1                      |
| No abnormalities detected.                                                                                                                                                                                                                                                                                                          | 0                      |

Liver damage severity was assessed on a scale of 0-5 by a researcher blinded to the treatment groups by visual examination of randomly selected fields using an Olympus CH2 microscope (obj x10; eye x10) using the criteria above. A mean score from each section was determined from at least 20 separate fields.

See main article Fig 1C: group 1 - score 0; group 2 - score 0, group 3 - score 5; group 4 - score 5.

B:  $\alpha$ -smooth muscle actin immunostained liver sections - fibrogenic potential severity.

| <b>Criteria</b>                                                                                                                                                                  | <b>Damage Severity</b> |
|----------------------------------------------------------------------------------------------------------------------------------------------------------------------------------|------------------------|
| Extensive centrilobular staining with >50% central-portal bridging of stain. Average HSC staining area > 30% total field of view (with a central vein placed in centre of view). | 5                      |
| Centrilobular staining with 5 - 50% central-portal bridging of stain. Average HSC staining area 10 - 30% total field of view (with a central vein placed in centre of view).     | 4                      |
| Centrilobular staining with central-portal bridging of stain rare (< 5%). Average HSC staining area < 10% total field of view (with central vein placed in centre of view).      | 3                      |
| Majority (>50%) centrilobular regions show some positive but minimal areas of staining                                                                                           | 2                      |
| Majority (>50%) centrilobular regions normal with no apparent positive staining.                                                                                                 | 1                      |
| No staining within parenchyma - positive staining around periportal vein and artery vessels.                                                                                     | 0                      |

Liver fibrosis severity as determined by  $\alpha$ -smooth muscle actin immunostaining was assessed on a scale of 0-5 by a researcher blinded to the treatment groups by visual examination of randomly selected fields using an Olympus CH2 microscope (obj x10; eye x10) using the criteria above. A mean score from each section was determined from at least 20 separate fields.

See main article Fig 2A: group 1 - score 0; group 2 - score 0, group 3 - score 5; group 4 - score 2.

C: sirius red stained liver sections - fibrosis severity.

| <b>Criteria</b>                                                                                                        | <b>Damage Severity</b> |
|------------------------------------------------------------------------------------------------------------------------|------------------------|
| Extensive centrilobular staining with >70% central-portal bridging in randomly selected feilds.                        | 5                      |
| Centrilobular staining with 30-70% central-portal bridging in randomly selected feilds.                                | 4                      |
| Centrilobular staining with 5-30% central-portal bridging in randomly selected feilds.                                 | 3                      |
| Less than 5% central-portal bridging. Majority (>50%) centrilobular regions show some positive staining.               | 2                      |
| Less than 5% central-portal bridging. Majority (>50%) centrilobular regions normal with no apparent positive staining. | 1                      |
| No staining within parenchyma - postive staining around periportal vein and artery vessels.                            | 0                      |

Liver fibrosis severity as determined by sirius red staining was assessed on a scale of 0-5 by a researcher blinded to the treatment groups by visual examination of randomly selected fields using an Olympus CH2 microscope (obj x10; eye x10) using the criteria above. A mean score from each section was determined from at least 20 separate fields.

See main article Fig 2B: group 1 - score 0; group 2 - score 0, group 3 - score 5; group 4 - score 2.
